# Supplementary material for: Prevalence of abdominal obesity among Chinese adults in 2011
Source: PubMed Central journal article supplement — J Epidemiol. 2017 Apr 17;27(6):282–6. doi: 10.1016/j.je.2017.03.001 (PMC5463021; doi:10.1016/j.je.2017.03.001), 2017-04-17
Supplement: mmc1.pdf [file mmc1.pdf]

**eTable 1.** Prevalence of abdominal obesity (WC  $\geq 85^a$  for men and WC  $\geq 80^a$  for women) for adults aged 20 years and older: CHNS 2011

|                                           | % (95% CI)       |                  |                    |                  |
|-------------------------------------------|------------------|------------------|--------------------|------------------|
|                                           | Total            | Rural            | Urban <sup>c</sup> | Megacity         |
| All                                       |                  |                  |                    |                  |
| $\geq 20$ years                           | 56.4 (55.5–57.3) | 55.8 (54.6–57.1) | 56.2 (54.4–58.0)   | 57.5 (55.9–59.2) |
| Age adjusted $\geq 20$ years <sup>b</sup> | 52.5 (51.6–53.4) | 52.0 (50.8–53.3) | 51.7 (49.9–53.4)   | 54.2 (52.5–55.9) |
| Men                                       |                  |                  |                    |                  |
| $\geq 20$ years                           | 55.1 (53.9–56.4) | 52.0 (50.2–53.9) | 55.5 (52.9–58.1)   | 60.4 (58.0–62.8) |
| Age adjusted $\geq 20$ years <sup>b</sup> | 53.7 (52.4–54.9) | 50.7 (48.8–52.5) | 53.6 (51.1–56.2)   | 58.7 (56.3–61.2) |
| 20–39 years                               | 49.3 (46.6–52.0) | 46.5 (42.4–50.6) | 48.9 (43.3–54.5)   | 53.6 (48.7–58.5) |
| 40–59 years                               | 58.1 (56.3–60.0) | 55.9 (53.3–58.6) | 57.5 (53.7–61.3)   | 62.7 (59.2–66.2) |
| $\geq 60$ years                           | 54.7 (52.4–57.1) | 49.4 (46.0–52.8) | 57.1 (52.6–61.5)   | 63.0 (58.3–67.6) |

**eTable 1.** Prevalence of abdominal obesity (WC  $\geq 85^a$  for men and WC  $\geq 80^a$  for women) for adults aged 20 years and older: CHNS 2011 (continued)

|                                           | % (95% CI)       |                  |                    |                  |
|-------------------------------------------|------------------|------------------|--------------------|------------------|
|                                           | Total            | Rural            | Urban <sup>c</sup> | Megacity         |
| <b>Women</b>                              |                  |                  |                    |                  |
| $\geq 20$ years                           | 57.5 (56.3–58.7) | 59.2 (57.5–60.9) | 56.8 (54.4–59.2)   | 55.0 (52.7–57.3) |
| Age adjusted $\geq 20$ years <sup>b</sup> | 51.7 (50.5–52.9) | 53.4 (51.7–55.1) | 49.8 (47.4–52.2)   | 51.0 (48.6–53.3) |
| 20–39 years                               | 36.6 (34.2–39.0) | 39.3 (35.6–43.0) | 35.5 (30.3–40.7)   | 33.8 (29.8–37.8) |
| 40–59 years                               | 61.3 (59.5–63.0) | 62.9 (60.5–65.4) | 56.9 (53.3–60.5)   | 62.0 (58.6–65.3) |
| $\geq 60$ years                           | 68.2 (66.1–70.3) | 67.2 (64.2–70.2) | 69.3 (65.5–73.2)   | 69.2 (64.7–73.7) |

CHNS, China Health and Nutrition Survey; CI, confidence interval; WC, waist circumference.

<sup>a</sup> Calculated in centimeters

<sup>b</sup> Age adjusted using the direct method to the year 2010 Census population using the age groups 20–39 years, 40–59 years,

and  $\geq 60$  years

<sup>c</sup> Does not include the three megacities added in 2011

**eTable 2.** Mean WC for adults aged 20 years and older: CHNS 2011

|       |                                     | Mean <sup>a</sup> (95% CI) |                  |                    |                  |
|-------|-------------------------------------|----------------------------|------------------|--------------------|------------------|
|       |                                     | Total                      | Rural            | Urban <sup>c</sup> | Megacity         |
| All   |                                     |                            |                  |                    |                  |
|       | ≥20 years                           | 84.0 (83.8–84.2)           | 83.9 (83.6–84.1) | 83.9 (83.5–84.2)   | 84.3 (84.0–84.7) |
|       | Age adjusted ≥20 years <sup>b</sup> | 83.1 (82.9–83.3)           | 82.9 (82.6–83.1) | 82.8 (82.4–83.2)   | 83.7 (83.3–84.0) |
| Men   |                                     |                            |                  |                    |                  |
|       | ≥20 years                           | 86.2 (85.9–86.5)           | 85.4 (85.0–85.8) | 86.4 (85.8–86.9)   | 87.5 (87.0–88.0) |
|       | Age adjusted ≥20 years <sup>b</sup> | 85.9 (85.6–86.2)           | 85.0 (84.6–85.4) | 85.9 (85.4–86.4)   | 87.3 (86.8–87.8) |
|       | 20–39 years                         | 84.9 (84.3–85.5)           | 83.9 (83.0–84.8) | 84.6 (83.5–85.7)   | 86.7 (85.7–87.8) |
|       | 40–59 years                         | 87.0 (86.6–87.4)           | 86.5 (86.0–87.0) | 87.1 (86.3–87.9)   | 87.8 (87.1–88.5) |
|       | ≥60 years                           | 85.9 (85.4–86.4)           | 84.7 (84.0–85.4) | 86.5 (85.5–87.5)   | 87.6 (86.6–88.5) |
| Women |                                     |                            |                  |                    |                  |

**eTable 2.** Mean WC for adults aged 20 years and older: CHNS 2011 (continued)

|                                     | Mean <sup>a</sup> (95% CI) |                  |                    |                  |
|-------------------------------------|----------------------------|------------------|--------------------|------------------|
|                                     | Total                      | Rural            | Urban <sup>c</sup> | Megacity         |
| ≥20 years                           | 82.1 (81.8–82.3)           | 82.5 (82.2–82.9) | 81.6 (81.1–82.1)   | 81.6 (81.1–82.1) |
| Age adjusted ≥20 years <sup>b</sup> | 80.7 (80.4–80.9)           | 81.0 (80.7–81.4) | 80.0 (79.5–80.5)   | 80.7 (80.2–81.2) |
| 20–39 years                         | 77.1 (76.7–77.6)           | 77.4 (76.7–78.1) | 76.7 (75.7–77.6)   | 77.0 (76.3–77.8) |
| 40–59 years                         | 82.9 (82.5–83.2)           | 83.5 (83.0–84.0) | 81.3 (80.6–82.0)   | 83.0 (82.3–83.6) |
| ≥60 years                           | 84.8 (84.3–85.2)           | 84.6 (83.9–85.3) | 85.0 (84.1–85.9)   | 84.8 (83.8–85.9) |

CHNS, China Health and Nutrition Survey; CI, confidence interval; WC, waist circumference.

<sup>a</sup> Calculated in centimeters

<sup>b</sup> Age adjusted using the direct method to the year 2010 Census population using the age groups 20–39 years, 40–59 years, and ≥60 years

<sup>c</sup> Does not include the three megacities added in 2011
